# Supplementary material for: All-polymer solar cells with bulk heterojunction nanolayers of chemically doped electron-donating and electron-accepting polymers
Source: Royal Society of Chemistry journal article supplement (doi:10.1039/c2cp43002a), 2012-01-01
Supplement: c2cp43002a.pdf [file c2cp43002a.pdf]

## **Electronic Supplementary Information**

### **All-Polymer Solar Cells with Bulk Heterojunction Nanolayers of Chemically Doped Electron-Donating and Electron-Accepting Polymers**

Sungho Nam,<sup>a</sup> Minjung Shin,<sup>a,b</sup> Soohyeong Park,<sup>a</sup> Sooyong Lee,<sup>a</sup> Hwajeong Kim,<sup>a,c</sup> and Youngkyoo Kim<sup>\*a</sup>

<sup>a</sup>*Organic Nanoelectronics Laboratory, Department of Chemical Engineering, Kyungpook National University, Daegu 702-701, Republic of Korea*

<sup>b</sup>*Solar Cell Business Team, LG Innotek, Gyeonggo-do 447-705, Republic of Korea*

<sup>c</sup>*Priority Research Center, Research Institute of Advanced Energy Technology, Kyungpook National University, Daegu 702-701, Republic of Korea*

\*Corresponding Author: Prof. Y. Kim

Email) [ykimm@knu.ac.kr](mailto:ykimm@knu.ac.kr)

**Table S1.** Summary of solar cell parameters for the P3HT:F8BT (undoped) and P3HT-EBSA:F8BT-EBSA (doped) solar cells according to thermal annealing temperatures ( $T_A$ ). “D” and “A” denote donor and acceptor, respectively.

|                                         | D:A = 6:4 |      |       |       |      |       | D:A = 8:2 |      |       |       |      |      |
|-----------------------------------------|-----------|------|-------|-------|------|-------|-----------|------|-------|-------|------|------|
|                                         | Undoped   |      |       | Doped |      |       | Undoped   |      |       | Doped |      |      |
| $T_A$<br>(°C)                           | 130       | 140  | 150   | 130   | 140  | 150   | 130       | 140  | 150   | 130   | 140  | 150  |
| $V_{oc}$<br>(V)                         | 0.70      | 1.07 | 0.94  | 0.96  | 1.18 | 1.06  | 0.87      | 0.83 | 0.71  | 1.25  | 1.26 | 1.27 |
| $J_{sc}$<br>(mA/cm <sup>2</sup> )       | 0.39      | 0.36 | 0.37  | 1.18  | 0.97 | 0.96  | 0.46      | 0.45 | 0.45  | 1.06  | 1.07 | 0.98 |
| FF<br>(%)                               | 25.6      | 29.6 | 28.4  | 26.0  | 27.0 | 25.9  | 26.3      | 26.7 | 26.2  | 29.6  | 29.7 | 30.4 |
| PCE<br>(%)                              | 0.07      | 0.11 | 0.1   | 0.29  | 0.31 | 0.26  | 0.11      | 0.10 | 0.08  | 0.39  | 0.4  | 0.38 |
| $R_s$<br>(k $\Omega$ ·cm <sup>2</sup> ) | 19.5      | 26.1 | 22.96 | 8.30  | 10.7 | 11.76 | 16.76     | 18.4 | 16.75 | 7.61  | 7.1  | 7.23 |

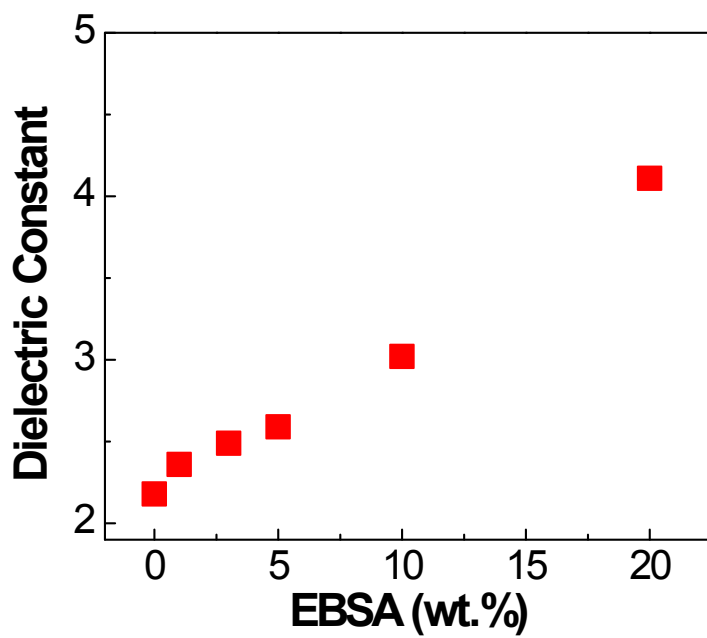

**Figure S1.** Dielectric constant (at 1 kHz) of the P3HT-EBSA films as a function of the EBSA content which were used for the hole-only devices.

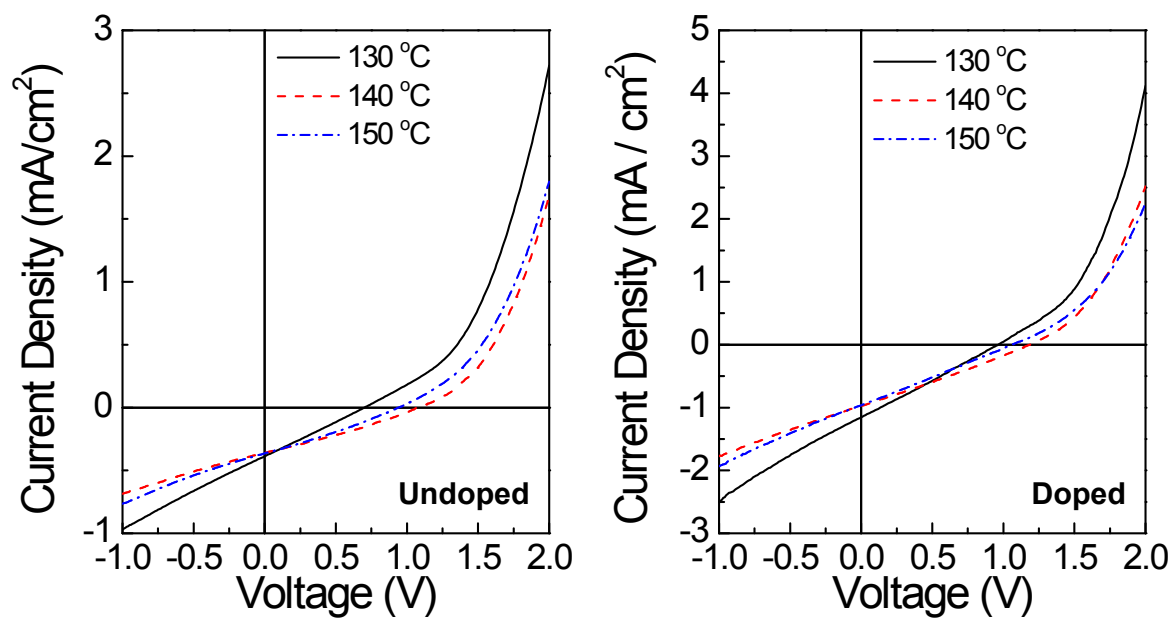

**Figure S2.** Light J-V curves for the polymer:polymer solar cells annealed at three different annealing temperatures: (left) P3HT:F8BT (6:4) solar cells, (right) P3HT-EBSA:F8BT-EBSA (6:4) solar cells.

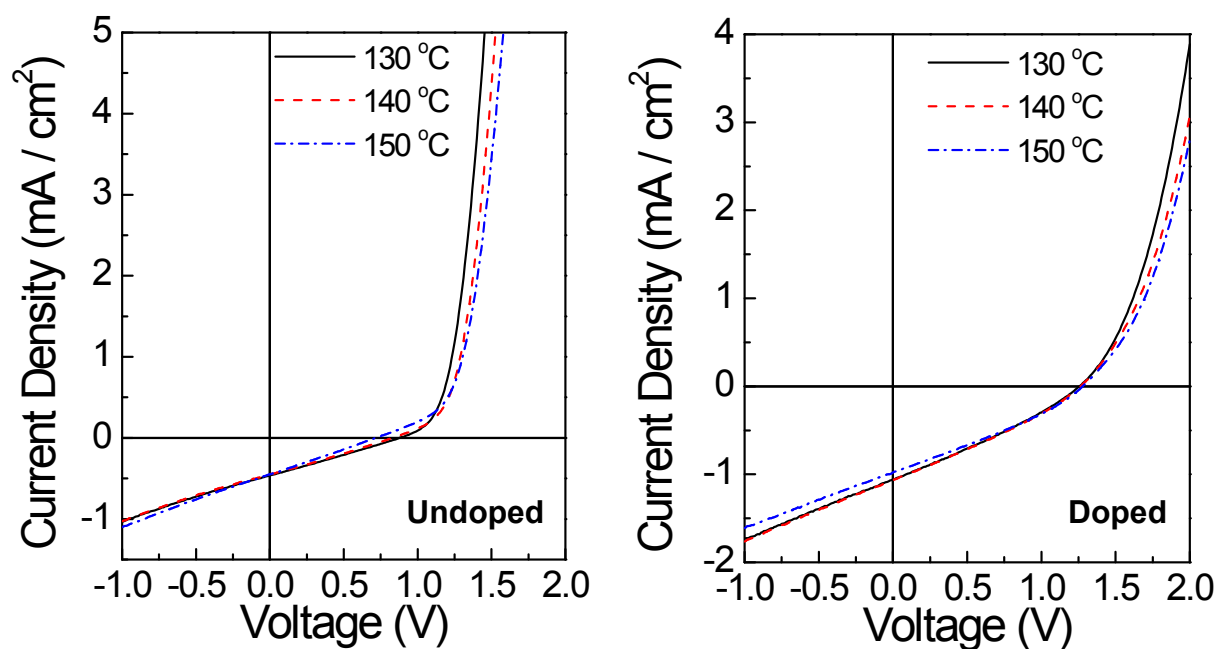

**Figure S3.** Light J-V curves for the polymer:polymer solar cells annealed at three different annealing temperatures: (left) P3HT:F8BT (8:2) solar cells, (right) P3HT-EBSA:F8BT-EBSA (8:2) solar cells.
